# Supplementary material for: Insulin Regulates Glucose Consumption and Lactate Production through Reactive Oxygen Species and Pyruvate Kinase M2
Source: Hindawi journal article supplement (doi:10.1155/2014/504953), 2014-01-01
Supplement: f1 [file 504953.f1.zip]

---

**Table 1. List of primers used in real-time RT-PCR experiments**

---

|                                    |                                                               |
|------------------------------------|---------------------------------------------------------------|
| <b>miR-145-stem-loop RT primer</b> | <b>5'- CTCAACTGGTGTCTCGTGGAGTCGGCAATTCAGTTGAGAAGGGATT -3'</b> |
| <b>miR-145-forward</b>             | <b>5'- ACACTCCAGCTGGGGTCCAGTTTTCCCAGGAA -3'</b>               |
| <b>miR-145-reverse</b>             | <b>5'- GTTCGCTGAGATGAAGCACTG -3'</b>                          |
| <b>miR-128-stem-loop RT primer</b> | <b>5'- CTCAACTGGTGTCTCGTGGAGTCGGCAATTCAGTTGAGAAAAGAGA -3'</b> |
| <b>miR-128-forward</b>             | <b>5'- ACACTCCAGCTGGGTCACAGTGAACCGGTC -3'</b>                 |
| <b>miR-128-stem-loop RT primer</b> | <b>5'- TGGTGTCTCGTGGAGTCG -3'</b>                             |
| <b>U6-stem-loop RT primer</b>      | <b>5'- AACGCTTCACGAATTTGCGT -3'</b>                           |
| <b>U6-forward</b>                  | <b>5'- CTCGCTTCGGCAGCACA -3'</b>                              |
| <b>U6-reverse</b>                  | <b>5'- TGGTGTCTCGTGGAGTCG -3'</b>                             |
| <b>PKM2-forward</b>                | <b>5'- CGAGCCTCAAGTCACTCCAC -3'</b>                           |
| <b>PKM2-reverse</b>                | <b>5'- GTGAGCAGACCTGCCAGACT-3'</b>                            |
| <b>GAPDH-forward</b>               | <b>5'-ATGGGTGTGAACCATGAGAAGTATG-3'</b>                        |
| <b>GAPDH-reverse</b>               | <b>5'-GGTGCAGGAGGCATTGCT-3'</b>                               |

---

---

**Table 2. List of the precursor sequences**

---

|                                        |                                        |
|----------------------------------------|----------------------------------------|
| <b>miR-145 mimics (sense)</b>          | <b>5'- GUCCAGUUUUCCCAGGAAUCCCU -3'</b> |
| <b>miR-145 mimics (antisense)</b>      | <b>5'- UUCAGGUCAAAAGGGUCCUUAGG -3'</b> |
| <b>miR-128 mimics (sense)</b>          | <b>5'- UCACAGUGAACCGGUCUCUUU -3'</b>   |
| <b>miR-128 mimics (antisense)</b>      | <b>5'- AGAGACCGGUUCACUGUGAUU -3'</b>   |
| <b>scrambled precursor (sense)</b>     | <b>5'- UUCUCCGAACGUGUCACGUTT -3'</b>   |
| <b>scrambled precursor (antisense)</b> | <b>5'- ACGUGACACGUUCGGAGAATT -3'</b>   |

---

---

**Table 3. List of the Small interfering RNA sequences**

---

|                           |                                      |
|---------------------------|--------------------------------------|
| <b>siPKM2 (sense)</b>     | <b>5'- GCTGTGGCTCTAGACACTATT -3'</b> |
| <b>siPKM2 (antisense)</b> | <b>5'- CGACACCGAGATCTGTGATTT-3'</b>  |

---
