# Supplementary material for: Insulin Regulates Glucose Consumption and Lactate Production through Reactive Oxygen Species and Pyruvate Kinase M2
Source: Hindawi journal article supplement (doi:10.1155/2014/504953), 2014-01-01
Supplement: f1 [file 504953.f1.zip]

### Supplementary figure legends

**FIGURE.S1.** HepG2 cells and Bel7402 cells were cultured in serum-free medium overnight. Then cells were treated with 50  $\mu$ M H<sub>2</sub>O<sub>2</sub> for 6 h. Total RNAs were extracted and used for real time RT-PCR analysis for detecting the expression levels of miR-145, miR-128 and U6. \*\* indicates significant difference compared to control (p< 0.01).
